# Supplementary material for: Effects of solvents, additives, and π-allyl ligand structures on the polymerization behavior of diazoacetates initiated by π-allylPd complexes
Source: Royal Society of Chemistry journal article supplement (doi:10.1039/c9py01654f), 2020-01-01
Supplement: c9py01654f1.pdf [file c9py01654f1.pdf]

Supporting Information for

**Effects of solvents, additives, and  $\pi$ -allyl ligand structures on the polymerization behavior of diazoacetates initiated by  $\pi$ -allylPd complexes**

Hiroaki Shimomoto\*, Moemi Nakajima, Akihiro Watanabe, Hirokazu Murakami, Tomomichi Itoh, and Eiji Ihara\*

*Department of Materials Science and Biotechnology, Graduate School of Science and Engineering, Ehime University, 3  
Bunkyo-cho, Matsuyama 790-8577, Japan*

Phone & Fax: +81-89-927-8547, E-mail: ihara@ehime-u.ac.jp (E.I)

Phone & Fax: +81-89-927-9949, E-mail: shimomoto.hiroaki.mx@ehime-u.ac.jp (H.S)





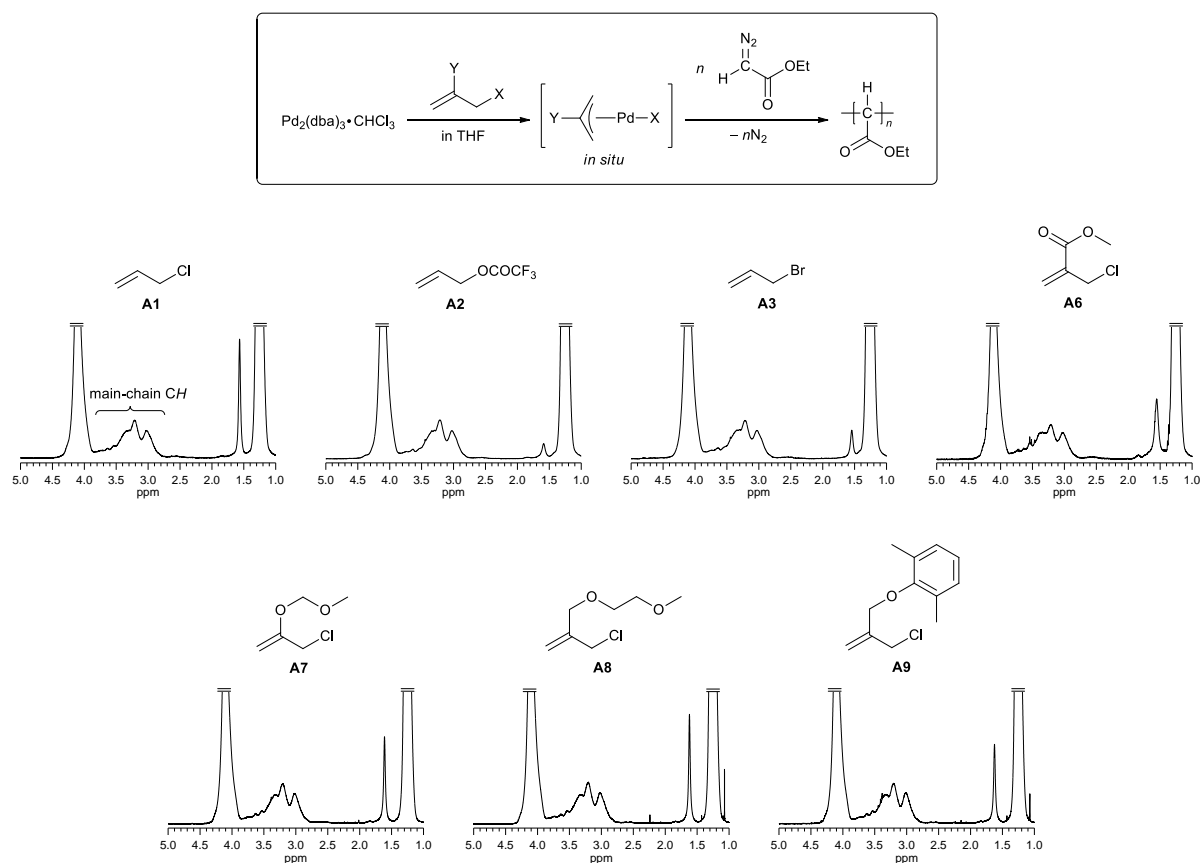

**Figure S5.**  $^1\text{H}$  NMR spectra of the EDA polymers obtained with  $\text{Pd}_2(\text{dba})_3 \cdot \text{CHCl}_3$ /allyl compound systems.
